1  
2

# **Mitigating the impact of COVID-19 on tuberculosis and HIV services: a cross-sectional survey of 669 health professionals in 64 low and middle-income countries**

Mishal S. Khan<sup>1\*</sup>, Sonia Rego<sup>1\*</sup>, Joaquín Benítez Rajal, Virginia Bond<sup>1,2</sup>, Razia Kaneez Fatima<sup>3</sup>, Afshan Khurshid Isani<sup>4</sup>, Jayne Sutherland<sup>5</sup>, Katharina Kranzer<sup>1,6</sup>

1 London School of Hygiene & Tropical Medicine, London, UK

2 Zambart, School of Public Health, University of Zambia, Lusaka, Zambia

3 Common Management Unit (HIV/AIDS, TB & Malaria), Islamabad, Pakistan

4 National Core Research group, Stop TB Partnership, Pakistan

5 MRC Unit The Gambia at London School of Hygiene & Tropical Medicine, Fajara, The Gambia

6 Division of Infectious and Tropical Medicine, Medical Centre of the University of Munich, Munich, Germany

\* Joint first authors

Corresponding Author:

Mishal S. Khan

15-17 Tavistock Place, London, UK, WC1H 9SH

[mishal.khan@lshtm.ac.uk](mailto:mishal.khan@lshtm.ac.uk)

### 3 **Abstract**

4

### 5 **Objective**

6 The experiences of frontline healthcare professionals are essential in identifying strategies  
7 to mitigate the disruption to healthcare services caused by the COVID-19 pandemic.

8

### 9 **Methods**

10 We conducted a cross-sectional study of TB and HIV professionals in low and middle-income  
11 countries (LMIC). Between May 12 and August 6 2020, we collected qualitative and  
12 quantitative data using an online survey in 11 languages. We used descriptive statistics and  
13 thematic analysis to analyse responses.

14

### 15 **Findings**

16 669 respondents from 64 countries completed the survey. Over 40% stated that it was  
17 either impossible or much harder for TB and HIV patients to reach healthcare facilities since  
18 COVID-19. The most common barriers reported to affect patients were: fear of getting  
19 infected with SARS-CoV-2, transport disruptions and movement restrictions. 37% and 28%  
20 of responses about TB and HIV stated that healthcare provider access to facilities was also  
21 severely impacted. Strategies to address reduced transport needs and costs – including  
22 proactive coordination between the health and transport sector and cards that facilitate  
23 lower cost or easier travel - were presented in qualitative responses. Access to non-medical  
24 support for patients, such as food supplementation or counselling, was severely disrupted  
25 according to 36% and 31% of HIV and TB respondents respectively; qualitative data  
26 suggested that the need for such services was exacerbated.

## 27 **Conclusion**

28 Patients and healthcare providers across numerous LMIC faced substantial challenges in  
29 accessing healthcare facilities, and non-medical support for patients was particularly  
30 impacted. Synthesising recommendations of frontline professionals should be prioritised for  
31 informing policymakers and healthcare service delivery organisations.

32

33

34

## 35 Introduction

36

37 The direct health effects of the COVID-19 pandemic are colossal, and are continuing to  
38 grow, with approximately one million deaths directly attributed to COVID-19 (1). However,  
39 researchers and practitioners have already highlighted that the indirect effects of COVID-19  
40 on global health - through the disruption of essential healthcare services - may be even  
41 larger and longer lasting (2, 3).

42

43 TB and HIV are the two infectious diseases that cause the highest number of deaths  
44 globally; in 2018, 1.5 and 1.1 million people died from TB and from HIV-related illnesses  
45 respectively (5, 6). National programmes for controlling these diseases already face  
46 immense challenges, and the pandemic has increased these by diverting healthcare  
47 professionals and resources to contain COVID-19 (7, 8). Evidence from the Ebola crisis  
48 provides a warning of the reversals in progress that accompany a pandemic; for example,  
49 significant decreases in diagnoses of smear-positive TB, HIV testing and antiretroviral  
50 therapy uptake in Liberia have been documented (9). A modelling study estimating the  
51 impact of severe disruptions to service delivery predicted that HIV and TB deaths could  
52 increase by up to 10% and 20% over five years respectively in high-burden settings,  
53 reverting to levels seen a decade ago(10).

54

55 Policies to minimise disruptions to TB and HIV care must be put in place urgently. To do this,  
56 we need to understand the range of impacts of COVID-19 on TB and HIV services, and  
57 identify feasible strategies for mitigation. Information from frontline health professionals  
58 and researchers is invaluable and often insufficiently incorporated into policy planning or in

the formation of research questions (11, 12). In light of this, our study rapidly synthesised information from professionals working in affected countries, in order to identify both how COVID-19 is impacting TB and HIV services in LMIC and their recommendations for minimising disruptions.

## Methods

We analysed quantitative and qualitative data collected through a rapid cross-sectional survey of TB and HIV healthcare delivery, management and research professionals in LMIC around the world.

### *Study design, population and sampling*

Our open online survey was conducted between May 12 and August 6 2020. The methodology was designed based on a standardised checklist for internet surveys (CHERRIES) (13). Our target population was individuals who were involved in managing or delivering TB or HIV services, including, but not limited to: doctors, nurses, community healthcare providers, laboratory technicians, policymakers, health facility managers, representatives of charity, community or advocacy groups, and researchers.

We used three approaches to share the invitation to complete our survey. First, we sent information through online professional platforms and personal networks with colleagues (using email, WhatsApp or Twitter). Second, we hired one focal point for Asia, one for Latin America, and one for Africa. Focal points focused on contacting local organisations in their regions. Third, we used snowball sampling, whereby survey participants were asked to share

the survey with others who might have information to contribute. Through these approaches, the survey was shared with over 250 professional networks and organisations.

## *Survey*

The survey was initially designed in English by an international team with diverse expertise in TB and HIV control working in Europe, Asia and Africa. It was first piloted with eight professionals working in Cambodia, The Gambia, South Africa, The Philippines, Pakistan, Zambia and Zimbabwe; this allowed us to check face validity and refine the wording of questions and response options. Following this, we piloted an electronic version (in SurveyMonkey) with five public health professionals to check the accessibility and functionality of the survey as it appeared on the online platform.

Using SurveyMonkey enabled us to administer a survey that could only be answered once per device, and did not collect identifying information. We provided introductory text and a downloadable information sheet on the landing page. Respondents gave consent - after reading the information sheet - by checking boxes to confirm that they agreed to participate and allowed text responses to be quoted verbatim. It was possible for participants to agree to participate, but to decline use of verbatim quotes.

We used adaptive questioning, whereby nine HIV or TB- specific questions, or 18 covering both, were displayed based depending on which areas the respondent wanted to provide information about. Of the nine questions, seven were multiple choice (Table 2), with space to add free text using the 'other' option. There were two open response questions that only collected free text and these constitute the qualitative responses. The first asked about

COVID-19 related rules that have been introduced by the government and how these have impacted TB/HIV health services. The second solicited information about measures that can be taken (or have already been taken) to minimize disruptions. There was no limit to the amount of text a respondent could insert.

The survey and participant information sheet were translated into 10 additional languages: Arabic, Bahasa, Chinese, French, Portuguese, Russian, Shona, Spanish, Swahili, and Urdu. There were at least two translators for each language, so that every translation was checked by an independent native or fluent speaker.

#### *Data management and analysis*

All data was downloaded into MS Excel. The quantitative data was analysed using descriptive statistics (frequencies and percentages) in Stata/SE V.14 (StatCorp, Texas, USA).

Our qualitative analysis involved translating non-English language text into English, and conducting a thematic analysis. We used an interpretive approach in which identified themes were supported by the data. The thematic analysis process began by two authors agreeing on the emerging themes after reading the text responses independently and then coding the text line by line manually. Finally, we triangulated qualitative and quantitative results to validate findings.

#### *Ethical Approval*

We received ethical approval from the London School of Hygiene and Tropical Medicine, the University of Zambia and The South African Medical Association.

## 130     **Results**

131

132     Of the 923 respondents that initiated the consent process and accessed survey questions,  
 133     669 (72%) from 64 countries completed it. 567 respondents answered the TB section, and  
 134     346 answered the HIV section. There was a greater representation of health professional  
 135     based in sub-Saharan African countries in responses about HIV as compared to TB (Figure 1).  
 136     Demographic and professional characteristics of respondents are in Table 1.

137



***Table 1: Respondents' characteristics***

| Variables    |                                              | TB (n = 567)<br>N (%) | HIV (n = 346)<br>N (%) |
|--------------|----------------------------------------------|-----------------------|------------------------|
| Age (years)  | 18-24                                        | 13 (2.3)              | 5 (1.5)                |
|              | 25-34                                        | 160 (28.2)            | 105 (30.4)             |
|              | 35-44                                        | 181 (31.9)            | 118 (34.1)             |
|              | 45-54                                        | 128 (22.6)            | 68 (19.7)              |
|              | 55-64                                        | 70 (12.3)             | 41 (11.9)              |
|              | 65+                                          | 14 (2.5)              | 9 (2.6)                |
|              | Prefer not to answer                         | 1 (0.2)               | 0                      |
| Gender       | Female                                       | 302 (53.3)            | 168 (48.6)             |
|              | Male                                         | 257 (45.3)            | 176 (50.9)             |
|              | Prefer not to answer                         | 8 (1.4)               | 2 (0.6)                |
| Role         | Doctor providing care to patients            | 154 (27.2)            | 21 (6.1)               |
|              | Manager of health care facility or programme | 137 (24.2)            | 25 (7.2)               |
|              | Researcher                                   | 96 (16.9)             | 129 (37.3)             |
|              | Other health care provider                   | 47 (8.3)              | 16 (4.6)               |
|              | Community healthcare worker                  | 45 (7.9)              | 30 (8.7)               |
|              | Nurse providing patient care                 | 44 (7.8)              | 70 (20.2)              |
|              | Other                                        | 16 (2.8)              | 48 (13.9)              |
|              | Lab scientist                                | 14 (2.5)              | 2 (0.6)                |
|              | Public health specialist                     | 14 (2.5)              | 5 (1.5)                |
| Organisation | Public sector healthcare facility            | 194 (34.2)            | 122 (35.3)             |
|              | International non-governmental organisation  | 93 (16.4)             | 60 (17.3)              |
|              | Government agency                            | 60 (10.6)             | 24 (6.9)               |
|              | University or academic body                  | 57 (10.1)             | 41 (11.9)              |
|              | Private, for-profit healthcare facility      | 54 (9.5)              | 28 (8.1)               |
|              | Charity/non-profit healthcare facility       | 52 (9.2)              | 29 (8.4)               |
|              | Domestic non-governmental organisation       | 47 (8.3)              | 36 (10.4)              |
|              | Funding agency                               | 6 (1.1)               | 3 (0.9)                |
|              | Other                                        | 4 (0.7)               | 3 (0.9)                |

### ***Access to healthcare facilities for patients and providers***

Our survey indicated that access to healthcare facilities for TB and HIV healthcare providers and patients has been substantially affected (Table 2). Over 40% of respondents stated that it was impossible or much harder for TB and HIV patients to reach healthcare facilities since COVID-19. Similarly, it was much harder or impossible for TB healthcare providers to reach their place of work since COVID-19 began, according to 37% of respondents. Challenges

148 were also reported in relation to HIV healthcare providers reaching their place of work, but

149 these were not considered as severe as for HIV patients.

150

151 ***Table 2: Quantitative survey findings***  
152

| Questions                                                                                                                     |                                                              | TB (n = 567)<br>N (%) | HIV (n = 346)<br>N (%) |
|-------------------------------------------------------------------------------------------------------------------------------|--------------------------------------------------------------|-----------------------|------------------------|
| Has it been harder for healthcare providers to come to work at healthcare facilities since COVID-19?                          | No- same as before                                           | 98 (17.3)             | 61 (17.6)              |
|                                                                                                                               | Yes - it is slightly harder                                  | 245 (43.2)            | 182 (52.6)             |
|                                                                                                                               | Yes - it is much harder                                      | 179 (31.6)            | 85 (24.6)              |
|                                                                                                                               | Yes - it is very difficult or impossible                     | 28 (4.9)              | 13 (3.8)               |
|                                                                                                                               | Don't know                                                   | 14 (2.5)              | 4 (1.2)                |
|                                                                                                                               | Prefer not to answer                                         | 3 (0.5)               | 1 (0.3)                |
| Has it been harder for patients to come seek care at healthcare facilities since COVID-19?                                    | No- same as before                                           | 56 (9.9)              | 37 (10.7)              |
|                                                                                                                               | Yes - it is slightly harder                                  | 266 (46.9)            | 159 (46.0)             |
|                                                                                                                               | Yes - it is much harder                                      | 193 (34.0)            | 120 (34.7)             |
|                                                                                                                               | Yes - it is very difficult or impossible                     | 40 (7.1)              | 24 (6.9)               |
|                                                                                                                               | Don't know                                                   | 8 (1.4)               | 5 (1.5)                |
|                                                                                                                               | Prefer not to answer                                         | 4 (0.7)               | 1 (0.3)                |
| What do you think are the main concerns or barriers for patients to access healthcare since COVID-19                          | Fear of getting infected with SARS-CoV-2                     | 422 (74.4)            | 247 (71.4)             |
|                                                                                                                               | Transport disruption                                         | 395 (69.7)            | 270 (78.0)             |
|                                                                                                                               | Lockdown                                                     | 388 (68.4)            | 207 (59.8)             |
|                                                                                                                               | Reduced income/ money to travel                              | 295 (52.0)            | 260 (75.1)             |
|                                                                                                                               | Clinical closures                                            | 142 (25.0)            | 97 (28.0)              |
|                                                                                                                               | Health care workers shortage                                 | 131 (23.1)            | 102 (29.5)             |
|                                                                                                                               | Unable to access a face mask                                 | 123 (21.7)            | 68 (19.7)              |
|                                                                                                                               | Long waiting times                                           | 91 (16.0)             | 80 (23.1)              |
| Since COVID-19, are you aware of any changes to the way healthcare facilities are operating?                                  | There are no concerns                                        | 48 (8.5)              | 29 (8.4)               |
|                                                                                                                               | Physical distancing protocols for patients                   | 420 (74.1)            | 272 (78.6)             |
|                                                                                                                               | Masks or other protective equipment for healthcare providers | 399 (70.4)            | 255 (73.7)             |
| Have you experienced shortages of diagnostics or other challenges to provision of routine diagnostic services since COVID-19? | Prefer not to answer                                         | 22 (3.9)              | 12 (3.5)               |
|                                                                                                                               | No- same as before                                           | 168 (29.6)            | 120 (34.7)             |
|                                                                                                                               | Yes - it is slightly harder                                  | 193 (34.0)            | 124 (35.8)             |
|                                                                                                                               | Yes - it is much harder                                      | 139 (24.5)            | 63 (18.2)              |
|                                                                                                                               | Yes - it is very difficult or impossible                     | 23 (4.1)              | 19 (5.5)               |
|                                                                                                                               | Don't know                                                   | 36 (6.3)              | 16 (4.6)               |
| Have you experienced shortages of medicines or other challenges to provision of standard treatment since COVID-19?            | Prefer not to answer                                         | 8 (1.4)               | 4 (1.2)                |
|                                                                                                                               | No- same as before                                           | 300 (52.9)            | 159 (46.0)             |
|                                                                                                                               | Yes - it is slightly harder                                  | 150 (26.5)            | 113 (32.7)             |
|                                                                                                                               | Yes - it is much harder                                      | 58 (10.2)             | 43 (12.4)              |
|                                                                                                                               | Yes - it is very difficult or impossible                     | 7 (1.2)               | 13 (3.8)               |
|                                                                                                                               | Don't know                                                   | 41 (7.2)              | 16 (4.6)               |
| Has it been harder for patients to access non-medical support such as food supplementation or counselling since COVID-19?     | Prefer not to answer                                         | 11 (1.9)              | 2 (0.6)                |
|                                                                                                                               | No- same as before                                           | 103 (18.2)            | 60 (17.3)              |
|                                                                                                                               | Yes - it is slightly harder                                  | 223 (39.3)            | 122 (35.5)             |
|                                                                                                                               | Yes - it is much harder                                      | 137 (24.1)            | 97 (28.0)              |
|                                                                                                                               | Yes - it is very difficult or impossible                     | 38 (6.7)              | 27 (7.8)               |
|                                                                                                                               | Don't know                                                   | 19 (3.4)              | 6 (1.7)                |
|                                                                                                                               | Prefer not to answer                                         | 47 (8.3)              | 27 (7.8)               |

Concerns and barriers for TB and HIV patients to access healthcare were similar. The following were identified by more than 50% of respondents: fear of getting infected with SARS-CoV-2, transport disruptions, movement restrictions owing to lockdowns and reduced income. Disruption to transport services was a recurring theme in the qualitative data, mentioned over 30 times across Asian, African and Latin American countries. Specifically, it was highlighted that both reduced access to usual modes of transport and increased cost of transport created barriers to reaching healthcare facilities for both healthcare providers and patients. Furthermore, the impact of transport disruptions on essential supplies reaching healthcare facilities was noted repeatedly as an issue to address: *Monitor the lockdown enforcement to make sure it really doesn't hamper movement of essential items; other endemic diseases should not be neglected due to COVID-19. [M, doctor, Nigeria]*. Three policies to address transport disruptions suggested were: proactive coordination between the health and transport sector (including private transport companies); cards that facilitate lower cost or easier travel for patients and providers, and public information to reassure patients that they can travel for healthcare.

Alternative solutions, suggested by over 40 respondents, focused on ways to reduce the need for patients to travel to healthcare facilities. These solutions relied on bringing services closer to patients' homes, and providing medication for longer durations. As an adaptation to COVID-19 situation, it was commonly reported that medicines for TB and HIV were allowed to be given for several months at one time; some responses indicated challenges in doing this due to insufficient supplies. Provision of HIV and TB medicines to cover longer periods, however, does not address the need for patients to interact with healthcare providers as part of treatment monitoring and follow-up support. Telemedicine was

identified as a solution by more than 50 respondents. This was reported to be operating in some facilities in countries such as Argentina and South Africa, and was proposed as a way of providing better services in the future, even outside of a health emergency. *Antiretrovirals are handed out at home to avoid patient exposure...a telephone line was implemented for access to consultations through telemedicine.* [F, manager of health facility, Argentina]

Recommendations to bring healthcare closer to communities included delivery of counselling and medicines through community volunteers or local private providers, and setting up community collection points. Numerous respondents encouraged flexibility in where patients are allowed to collect medicines, since some patients may relocate to their villages from urban areas when employment opportunities are affected.

#### ***Disruptions to service provision at TB and HIV facilities***

Over 70% of respondents reported that TB and HIV facilities had revised their operating procedures to include physical distancing protocols for patients, and over 70% also reported that TB and HIV facilities had introduced Personal Protective Equipment (PPE) for healthcare providers. The importance of PPE, and masks in particular, was mentioned commonly (35 times for healthcare providers and 20 times for patients) across numerous countries. We noted a difference in whether respondents stressed the need for masks specifically for doctors, or for other providers such as laboratory technicians and community healthcare workers. We also found that some doctors and healthcare managers emphasised the need for education on infection prevention practices in conjunction with increased access to masks. Concerns were raised about a lack of clarity on who should be responsible for

providing PPE, and the cost burden on poorer patients if they are required to source their own masks: *Most TB patients are poor. They cannot afford masks and sanitizer [F, researcher, Pakistan]*

Only 16% and 11% of HIV and TB respondents reported that standard medical treatment was very difficult or impossible to provide. In contrast, we found that access to non-medical support for patients, such as food supplementation (where available) or counselling, was much harder or impossible to access according to 36% and 31% of respondents that answered questions about HIV and TB respectively. Less than 20% said that these important services were unchanged. Furthermore, the qualitative data suggested that nutritional support became particularly critical when movement restrictions and employment instability further reduced access to income and food. A repeated suggestion was that food supplementation should be paired with community-based delivery of drug supplies: *Poor patients also miss the nutrition they used to receive at the TB facilities. Provide nutrition with the drug supplies [M, health facility manager, Somalia]*

While many respondents advocated for the upkeep of counselling services for patients, the need for mental health support for providers was not mentioned. Increased workload and stress was mentioned as a problem, but few provided solutions. The solutions mentioned included financial incentives to compensate for the increased occupational risk and hiring of additional healthcare providers to account for the greater work load. Shift working systems were also suggested to reduce the number of healthcare providers in facilities at any given time, especially in space-limited settings such as laboratories.

## 225 ***Impacts on supply chains and diagnostic services***

226 There were mixed views on challenges around the provision of routine diagnostic services  
 227 for TB and HIV, indicating that the experiences of respondents varied considerably.  
 228 Approximately one third reported that providing diagnostic services had been slightly  
 229 harder and a similar proportion reported no change since COVID-19, while 29% and 24%  
 230 reported that TB and HIV diagnostic services were very hard or impossible to provide.  
 231 Qualitative data indicated that countries with more centralised production or storage of  
 232 essential supplies might face greater challenges in maintaining supply chains for diagnostics  
 233 due to greater reliance on transport. Similarly, where diagnostics were not produced  
 234 domestically, risk of disruptions increased, according to the qualitative data. Suggested  
 235 solutions included shifting to quality-assured local production and decentralisation of  
 236 diagnostics wherever possible.

237

## 238 ***Stigma***

239 Qualitative responses highlighted increased stigmatisation of HIV and TB patients owing to  
 240 changes in the delivery of health services. Examples provided by respondents included  
 241 stigmatisation when HIV patients were asked to show health cards in order to travel, when  
 242 patients presenting with TB symptoms were first isolated and tested for COVID-19, and  
 243 when attention is drawn to HIV or TB patients in their neighbourhoods during community-  
 244 based distribution of medicines.

245

246 *(It is) difficult to ask people living with HIV to show their medical records at road blocks as*  
 247 *this discloses their status. [F, doctor, Zimbabwe]*

248

*To develop a strategy for the supply of medication at a community level, being supplied together with other types of assistance to protect the identity of those wishing for health status anonymity. [F, community healthcare worker, Dominican Republic]*

Another strong theme was fear and stigma of COVID-19. It was frequently reported that people were worried that healthcare providers or community members would think they had COVID-19 if they sought care for TB. This was identified as a priority area to be addressed: *Need to reduce stigma about COVID-19 and associations with TB. [M, manager, Kenya]*

## **Discussion**

Our multi-country survey provides current evidence of the widespread impacts of COVID-19 on TB and HIV patients, healthcare providers and delivery of routine services. It also identifies specific policies and service delivery adaptations that can be implemented to mitigate disruptions. We summarise three key disruptions and their implications. First, we found that disruptions to transport services posed substantial challenges not only to patients, but also to healthcare providers. Second, our data indicated that addressing transport challenges alone would not be sufficient, owing to the barrier posed by patients' fears of contracting SARS-CoV-2. Third, in terms of disruption to service provision, the reduction in patient access to critical non-medical support was striking. Less than 20% of respondents stated that access to non-medical support was unaffected. As suggested by our qualitative data and other studies (14-16), mitigating disruptions to provision of food supplementation and mental health support is critical due to the increased stress, unemployment and loss of income caused by health emergencies.



273

274 Frontline professionals identified important solutions to minimise disruptions from health  
275 emergencies. Health service adaptations to reduce the need for long journeys to healthcare  
276 facilities, included: community-based kiosks to enable collection of medication,  
277 telemedicine services and telephone helplines. Some of these were proposed as sustainable  
278 improvements for healthcare delivery that could be adopted even outside of emergency  
279 situations. Practical strategies to address barriers to using transport services for accessing  
280 healthcare and to improve healthcare provider motivation and safety were also identified.

281

282 Researchers have concluded that health system resilience entails a combination of  
283 absorptive, adaptive and transformative strategies (20). For example, overcrowding of  
284 urban health can at least partly be overcome by community-based care and telemedicine.  
285 However, the consequences of ongoing adaptations on health outcomes and the impacts of  
286 changes in service delivery on stigma and equity must be constantly examined. For example,  
287 home delivery of medications may impact the former, while reliance on access to a phone  
288 for telemedicine services may impact the latter.

289

290 Complex health systems consist of both hardware (infrastructure, commodities, human  
291 resources and finances) and software (knowledge, values, norms, and feelings that shape  
292 health service delivery) (21). Our study indicated that the software of health systems, such  
293 as mental health and motivation of healthcare workers, both of which are known to be  
294 affected in outbreak situations, was being neglected by current responses to COVID-19 (22).

295

Finally, our study demonstrates that frontline professional in LMICs have invaluable experience, and that sharing information between organisations in the same country and across LMIC should be facilitated. Solutions applied in one country could be adapted for use in another LMIC, and may be more appropriate than policies designed by decision makers who are less embedded in the realities of LMIC health services (17-19).

Although there are important strengths of our survey-based study, such as rapid gathering of data in low technology settings, and the wide array of countries we received data from, we acknowledge that bias can result from 1) the non-representative nature of the population sampled and 2) the self-selection of participants. Though the survey was available in 11 languages, we missed professionals who speak other languages and we were informed by colleagues in some countries (Russia and China) that participants did not feel comfortable responding to such a survey. We also received more responses about TB than HIV.

## Conclusions

Data from this first multi-country survey focusing on experiences of frontline professionals showed that challenges to accessing healthcare facilities and maintaining routine service delivery – particularly in relation to diagnostics and non-medical support - were substantial across LMIC following COVID-19. Frontline professionals identified important mitigation strategies, including adaptations to reduce the costs or need for patients and providers to travel to healthcare facilities, measures to address healthcare provider safety and motivation, and approaches to tackle increases in stigma. These professionals, who are deeply involved in delivering, managing or analysing service delivery during emergencies

such as COVID-19, will not have the time or connections to influence planning of policies, despite having insights that are critical for effective policy setting. Rapid synthesis of information them can facilitate identification of service delivery barriers and bottlenecks presenting during emergency situations, and help develop effective adaptations. Furthermore, some of the emerging changes to healthcare delivery models could support better resilience against future emergencies.

### **Acknowledgements**

We had over twenty volunteers help us pilot and translate the survey and we are grateful to each of them. We thank Chepela Ngulube for supporting us on the ethics submission in Zambia. We would also like to acknowledge the LSHTM Alumni Association and LSHTM TB Centre.

## References

1. Dong E, Du H, Gardner L. An interactive web-based dashboard to track COVID-19 in real time. *The Lancet Infectious Diseases*. 2020;20(5):533-4.
2. Søreide K, Hallet J, Matthews JB, Schnitzbauer AA, Line PD, Lai PBS, et al. Immediate and long-term impact of the COVID-19 pandemic on delivery of surgical services. *Br J Surg*. 2020.
3. Semaan A, Audet C, Huysmans E, Afolabi B, Assarag B, Banke-Thomas A, et al. Voices from the frontline: findings from a thematic analysis of a rapid online global survey of maternal and newborn health professionals facing the COVID-19 pandemic. *BMJ Global Health*. 2020;5(6):e002967.
4. Hogan AB, Jewell BL, Sherrard-Smith E, Vesga JF, Watson OJ, Whittaker C, et al. Potential impact of the COVID-19 pandemic on HIV, tuberculosis, and malaria in low-income and middle-income countries: a modelling study. *The Lancet Global Health*.
5. WHO. "Tuberculosis." World Health Organization Fact Sheet 2020 [Available from: [www.who.int/news-room/fact-sheets/detail/tuberculosis](http://www.who.int/news-room/fact-sheets/detail/tuberculosis)].
6. WHO. Number of deaths due to HIV/AIDS 2020 [Available from: [www.who.int/gho/hiv/epidemic\\_status/deaths\\_text/en/](http://www.who.int/gho/hiv/epidemic_status/deaths_text/en/)].
7. Welsh T. Peter Sands breaks down the 'huge amount at stake' for HIV progress. *Devex: Inside Development AIDS 2020*. 2020 July 13, 2020.
8. Keene C, Mohr-Holland E, Cassidy T, Scott V, Nelson A, Furin J, et al. How COVID-19 could benefit tuberculosis and HIV services in South Africa. *The Lancet Respiratory Medicine*.

- 355 9. Konwloh PK, Cambell CL, Ade S, Bhat P, Harries AD, Wilkinson E, et al. Influence of  
356 Ebola on tuberculosis case finding and treatment outcomes in Liberia. *Public Health Action*.  
357 2017;7(Suppl 1):S62-S9.
- 358 10. McQuaid CF, McCreesh N, Read JM, Sumner T, Houben RMGJ, White RG, et al. The  
359 potential impact of COVID-19-related disruption on tuberculosis burden. *European*  
360 *Respiratory Journal*. 2020:2001718.
- 361 11. Boudarene L, James R, Coker R, Khan MS. Are scientific research outputs aligned with  
362 national policy makers' priorities? A case study of tuberculosis in Cambodia. *Health Policy*  
363 *and Planning*. 2017;32(suppl\_2):ii3-ii11.
- 364 12. Bradley JE, Mayfield MV, Mehta MP, Rukonge A. Participatory evaluation of  
365 reproductive health care quality in developing countries. *Soc Sci Med*. 2002;55(2):269-82.
- 366 13. Eysenbach G. Improving the quality of Web surveys: the Checklist for Reporting  
367 Results of Internet E-Surveys (CHERRIES). *J Med Internet Res*. 2004;6(3):e34-e.
- 368 14. van Griensven F, Chakkraband MLS, Thienkrua W, Pengjuntr W, Lopes Cardozo B,  
369 Tantipiwatanaskul P, et al. Mental Health Problems Among Adults in Tsunami-Affected  
370 Areas in Southern Thailand. *JAMA*. 2006;296(5):537-48.
- 371 15. van Ommeren M, Saxena S, Saraceno B. Mental and social health during and after  
372 acute emergencies: emerging consensus? *Bull World Health Organ*. 2005;83(1):71-6.
- 373 16. Fallah MP, Skrip LA, Gertler S, Yamin D, Galvani AP. Quantifying Poverty as a Driver  
374 of Ebola Transmission. *PLOS Neglected Tropical Diseases*. 2016;9(12):e0004260.
- 375 17. Dalglish SL. COVID-19 gives the lie to global health expertise. *Lancet*.  
376 2020;395(10231):1189-.
- 377 18. Hellmann F, Williams-Jones B, Garrafa V. COVID-19 and Moral Imperialism in  
378 Multinational Clinical Research. *Archives of Medical Research*. 2020.

- 379 19. Büyüm AM, Kenney C, Koris A, Mkumba L, Raveendran Y. Decolonising global health:  
380 if not now, when? *BMJ Global Health*. 2020;5(8):e003394.
- 381 20. Barasa EW, Cloete K, Gilson L. From bouncing back, to nurturing emergence:  
382 reframing the concept of resilience in health systems strengthening. *Health Policy and*  
383 *Planning*. 2017;32(suppl\_3):iii91-iii4.
- 384 21. Sheikh K, Gilson L, Agyepong IA, Hanson K, Ssengooba F, Bennett S. Building the Field  
385 of Health Policy and Systems Research: Framing the Questions. *PLOS Medicine*.  
386 2011;8(8):e1001073.
- 387 22. Kisely S, Warren N, McMahon L, Dalais C, Henry I, Siskind D. Occurrence, prevention,  
388 and management of the psychological effects of emerging virus outbreaks on healthcare  
389 workers: rapid review and meta-analysis. *BMJ*. 2020;369:m1642.
- 390







1  
2

Mishal S. Khan<sup>1\*</sup>, Sonia Rego<sup>1\*</sup>, Joaquín Benítez Rajal, Virginia Bond<sup>1,2</sup>, Razia Kaneez Fatima<sup>3</sup>, Afshan Khurshid Isani<sup>4</sup>, Jayne Sutherland<sup>5</sup>, Katharina Kranzer<sup>1,6</sup>

1 London School of Hygiene & Tropical Medicine, London, UK

2 Zambart, School of Public Health, University of Zambia, Lusaka, Zambia

3 Common Management Unit (HIV/AIDS, TB & Malaria), Islamabad, Pakistan

4 National Core Research group, Stop TB Partnership, Pakistan

5 MRC Unit The Gambia at London School of Hygiene & Tropical Medicine, Fajara, The Gambia

6 Division of Infectious and Tropical Medicine, Medical Centre of the University of Munich, Munich, Germany

\* Joint first authors

Corresponding Author:

Mishal S. Khan

15-17 Tavistock Place, London, UK, WC1H 9SH

[mishal.khan@lshtm.ac.uk](mailto:mishal.khan@lshtm.ac.uk)

## **Abstract**

### **Objective**

The experiences of frontline healthcare professionals are essential in identifying strategies to mitigate the disruption to healthcare services caused by the COVID-19 pandemic.

### **Methods**

We conducted a cross-sectional study of TB and HIV professionals in low and middle-income countries (LMIC). Between May 12 and August 6 2020, we collected qualitative and quantitative data using an online survey in 11 languages. We used descriptive statistics and thematic analysis to analyse responses.

### **Findings**

669 respondents from 64 countries completed the survey. Over 40% stated that it was either impossible or much harder for TB and HIV patients to reach healthcare facilities since COVID-19. The most common barriers reported to affect patients were: fear of getting infected with SARS-CoV-2, transport disruptions and movement restrictions. 37% and 28% of responses about TB and HIV stated that healthcare provider access to facilities was also severely impacted. Strategies to address reduced transport needs and costs – including proactive coordination between the health and transport sector and cards that facilitate lower cost or easier travel - were presented in qualitative responses. Access to non-medical support for patients, such as food supplementation or counselling, was severely disrupted according to 36% and 31% of HIV and TB respondents respectively; qualitative data suggested that the need for such services was exacerbated.

## **Conclusion**

Patients and healthcare providers across numerous LMIC faced substantial challenges in accessing healthcare facilities, and non-medical support for patients was particularly impacted. Synthesising recommendations of frontline professionals should be prioritised for informing policymakers and healthcare service delivery organisations.

**Figure 1: Geographical distribution of survey respondents**

HIV

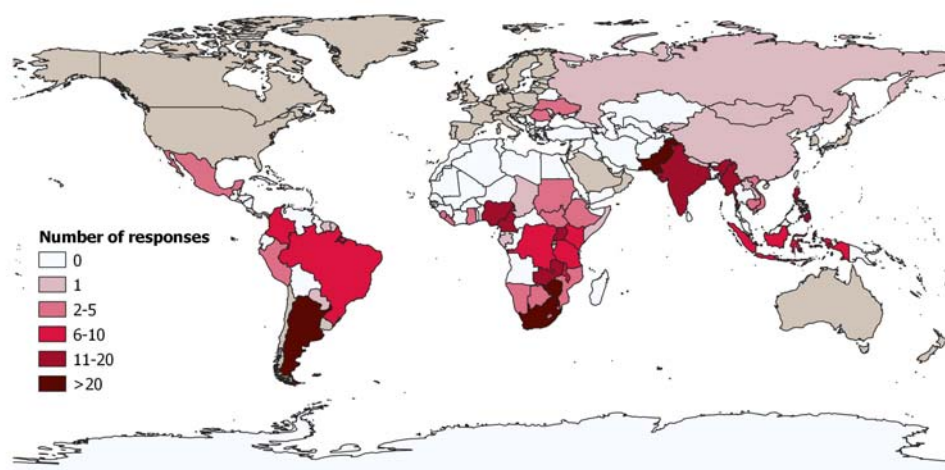

TB

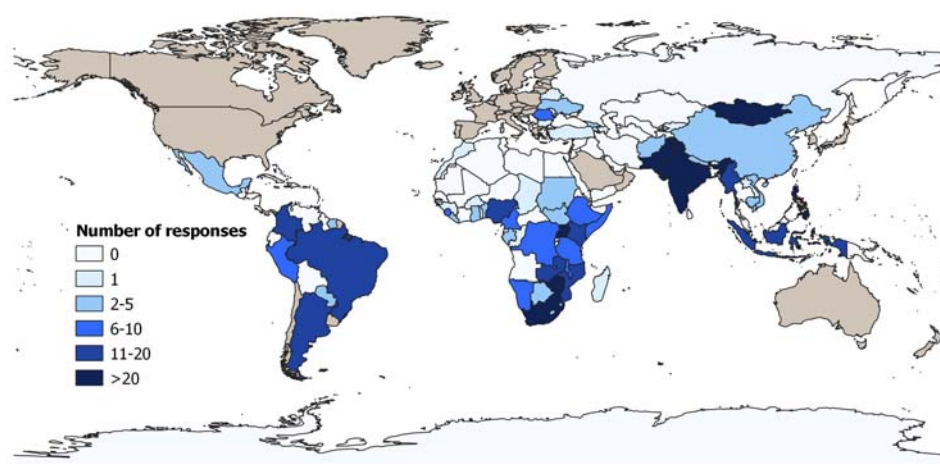

Source: http://medrxiv.org/cgi/reprint/2020.10.08.20207969v1
